# Supplementary material for: An Evaluation of Natural Environment Interventions for Informal Cancer Caregivers in the Community
Source: MDPI journal article supplement (doi:10.3390/ijerph182111124), 2021-10-22
Supplement: s1 [file s1]

**Table S1.** Full keyword search terms for each database.

| Database       | Terms                                                                                                                                                                                                                                                                                                                                                                                                                                                                                                                                                                                                                                                                                                                                                                                                                                                                                                                                                                                                                                                                                                                                                                                                                                                                                                               |
|----------------|---------------------------------------------------------------------------------------------------------------------------------------------------------------------------------------------------------------------------------------------------------------------------------------------------------------------------------------------------------------------------------------------------------------------------------------------------------------------------------------------------------------------------------------------------------------------------------------------------------------------------------------------------------------------------------------------------------------------------------------------------------------------------------------------------------------------------------------------------------------------------------------------------------------------------------------------------------------------------------------------------------------------------------------------------------------------------------------------------------------------------------------------------------------------------------------------------------------------------------------------------------------------------------------------------------------------|
| PubMed         | (((((Caregiv* OR "Caregivers"[Mesh]) AND (family OR "Family"[Mesh] OR friend "Friends"[Mesh] OR spous* OR "significant other" OR "Spouses"[Mesh] OR partner OR husband OR wife OR dyad OR relative OR informal OR unpaid OR lay)) AND (Cancer* OR "Neoplasms"[Mesh] OR oncolog* OR neoplasm*)) AND (Nature OR park* OR greenspace* OR "green space" OR "green spaces" OR tree* OR garden* OR landscape* OR "nature sound" OR "nature sounds" OR "Nature"[Mesh] OR "Parks, Recreational"[Mesh] OR "Trees"[Mesh] OR "Gardens"[Mesh] OR "natural environment" OR horticulture OR outdoor* OR environment OR outside OR ecolog* OR "Ecology"[Mesh] OR ocean OR "Oceans and Seas"[Mesh] OR lake OR "Lakes"[Mesh] OR river OR "Rivers"[Mesh] OR forest* OR "Forests"[Mesh] OR wood* OR "Horticulture"[Mesh] OR "Environment"[Mesh] OR neighborhood OR sidewalk* OR "botanical garden" OR "botanical gardens" OR flower OR floral OR plant*)) AND (Therap* OR "Therapeutics"[Mesh] OR "Recreation Therapy"[Mesh] OR "recreation therapy" OR "horticulture therapy" OR "Horticultural Therapy"[Mesh] OR "Complementary Therapies"[Mesh] OR "complementary therapies" OR "alternative therapies" OR "quality of life" OR QoL OR "Quality of Life"[Mesh] OR integrative OR "integrative therapies" OR "integrative therapy")) |
| CINAHL         | (caregiv* OR (MH "Caregivers")) AND ( family OR (MH "Family") OR friend OR spous* OR (MH "Spouses") OR "significant other" OR (MH "Significant Other") OR partner OR husband OR wife OR dyad OR relative OR informal OR unpaid OR lay) AND (cancer* OR neoplasm* OR oncolog* OR (MH "Oncology") OR (MH "Neoplasms")) AND ( nature OR landscape* OR tree* OR park* OR greenspace* OR "green space" OR garden* OR "nature sound" OR "natural environment" OR (MH "Natural Environment") OR horticulture OR outdoor* OR environment* OR outside* OR outdoor* OR ecolog* OR ocean* OR lake* OR river* OR forest* OR wood* OR neighborhood OR "botanical garden" OR flower* OR plant OR (MH "Flowers") OR (MH "Plants")) AND (therap* OR "horticulture therap*" OR "recreation therap" OR "complementary therap*" OR "alternative therap*" OR "quality of life" OR QoL OR "integrative therap*" OR (MH "Quality of Life") OR (MH "Alternative Therapies") OR integrative)                                                                                                                                                                                                                                                                                                                                                |
| AltHealthWatch | caregiv* AND (family OR friend OR spous* OR "significant other" OR partner OR husband OR wife OR dyad OR relative OR informal OR unpaid OR lay) AND (cancer* OR neoplasm* OR oncolog*) AND (nature OR landscape* OR tree* OR park* OR greenspace OR "green space" OR garden* OR "nature sound" OR "natural environment" OR ocean* OR lake* OR river* OR forest* OR wood* OR outdoor* OR outside* OR ecology* OR neighborhood OR "botanical garden" OR flower OR floral OR plant*) AND (therap* OR "horticulture therap*" OR "recreation therap" OR "complementary therap*" OR "alternative therap*" OR "quality of life" OR QoL OR "integrative therap*" OR integrative)                                                                                                                                                                                                                                                                                                                                                                                                                                                                                                                                                                                                                                            |
| Cochrane       | caregiv* AND (family OR friend OR spous* OR "significant other" OR partner OR husband OR wife OR dyad OR relative OR informal OR unpaid OR lay) AND (cancer* OR neoplasm* OR oncolog*) AND (nature OR landscape* OR tree* OR park* OR greenspace OR "green space" OR garden* OR "nature sound" OR "natural environment" OR ocean* OR lake* OR river* OR forest* OR wood* OR outdoor* OR outside* OR ecology* OR neighborhood OR "botanical garden" OR flower OR floral OR plant*) AND (therap* OR                                                                                                                                                                                                                                                                                                                                                                                                                                                                                                                                                                                                                                                                                                                                                                                                                   |

| Database | Terms                                                                                                                                                                                                                                                                                                                                                                                                                                                                                                                                                                                                                                                                                        |
|----------|----------------------------------------------------------------------------------------------------------------------------------------------------------------------------------------------------------------------------------------------------------------------------------------------------------------------------------------------------------------------------------------------------------------------------------------------------------------------------------------------------------------------------------------------------------------------------------------------------------------------------------------------------------------------------------------------|
|          | "horticulture therap*" OR "recreation therap" OR "complementary therap*" OR "alternative therap*" OR<br>"quality of life" OR QoL OR "integrative therap*" OR integrative)                                                                                                                                                                                                                                                                                                                                                                                                                                                                                                                    |
| Scopus   | caregiv* AND (family OR friend OR spous* OR "significant other" OR partner OR husband OR wife OR<br>dyad OR relative OR informal OR unpaid OR lay) AND (cancer* OR neoplasm* OR oncolog*) AND (nature<br>OR landscape* OR tree* OR park* OR greenspace OR "green space*" OR garden* OR "nature sound*" OR<br>"natural environment" OR ocean* OR lake* OR river* OR forest* OR wood* OR outdoor* OR outside* OR<br>ecology* OR neighborhood OR "botanical garden" OR flower OR floral OR plant*) AND (therap* OR<br>"horticulture therap*" OR "recreation therap" OR "complementary therap*" OR "alternative therap*" OR<br>"quality of life" OR QoL OR "integrative therap*" OR integrative) |
